# Degenerative expansion of a young supergene

| Authors (in order):       | Email                                                                  | Affiliation |
|---------------------------|------------------------------------------------------------------------|-------------|
| Eckart Stolle*            | <a href="mailto:e.stolle@qmul.ac.uk">e.stolle@qmul.ac.uk</a>           | 1, 2        |
| Rodrigo Pracana           | <a href="mailto:r.pracana@qmul.ac.uk">r.pracana@qmul.ac.uk</a>         | 1           |
| Philip Howard             | <a href="mailto:philip.howard@qmul.ac.uk">philip.howard@qmul.ac.uk</a> | 1           |
| Carolina I. Paris         | <a href="mailto:baikibadai@yahoo.com">baikibadai@yahoo.com</a>         | 3           |
| Susan J. Brown            | <a href="mailto:sjbrown@ksu.edu">sjbrown@ksu.edu</a>                   | 4           |
| Claudia Castillo-Carrillo | <a href="mailto:clau.acc@hotmail.com">clau.acc@hotmail.com</a>         | 1           |
| Stephen J. Rossiter       | <a href="mailto:s.j.rossiter@qmul.ac.uk">s.j.rossiter@qmul.ac.uk</a>   | 1           |
| Yannick Wurm*             | <a href="mailto:y.wurm@qmul.ac.uk">y.wurm@qmul.ac.uk</a>               | 1           |

## Affiliations:

- 1: School of Biological and Chemical Sciences, Queen Mary University of London, Mile End Road, Fogg Building, London, E14NS, UK
- 2: Current address: Institut für Biologie, Martin-Luther-University Halle-Wittenberg, Germany, Hoher Weg 8, 06099 Halle, Germany
- 3: Departamento Ecología, Genética y Evolución, Facultad de Ciencias Exactas y Naturales, Universidad de Buenos Aires, Intendente Güiraldes 2160, Ciudad Universitaria Pabellón 2, C1428EHA, Buenos Aires, Argentina
- 4: Division of Biology, Ackert Hall, Kansas State University, Manhattan KS USA 66506

## \* Corresponding authors:

**Yannick Wurm:** [y.wurm@qmul.ac.uk](mailto:y.wurm@qmul.ac.uk) Tel: +44 7514533020 Skype: yannickwurm  
**Eckart Stolle:** [eckart.stolle@zoologie.uni-halle.de](mailto:eckart.stolle@zoologie.uni-halle.de)

# Degenerative expansion of a young supergene

15

16

17 Eckart Stolle<sup>1,2\*</sup>, Rodrigo Pracana<sup>1</sup>, Philip Howard<sup>1</sup>, Carolina I. Paris<sup>3</sup>, Susan J. Brown<sup>4</sup>,  
18 Claudia Castillo-Carrillo<sup>1</sup>, Stephen J. Rossiter<sup>1</sup>, Yannick Wurm<sup>1\*</sup>

19 ***Suppressed recombination ultimately leads to gene loss, as demonstrated by the***  
20 ***depauperate Y chromosomes of long-established XY pairs. To understand the shorter***  
21 ***term effects, we used high-resolution optical mapping and k-mer distribution analysis***  
22 ***on a young non-recombining region of fire ant social chromosomes. Instead of***  
23 ***shrinking, the region has increased in length by more than 30%. This demonstrates***  
24 ***that degenerative expansion can occur during the early evolution of non-recombining***  
25 ***regions.***

26

27 Recombination facilitates the removal of deleterious mutations and creates advantageous  
28 combinations of alleles. However, in some circumstances reduced recombination is favored.  
29 This occurs during the early evolution of supergenes, in which selection favors the  
30 suppression of recombination between haplotypes with advantageous combinations of  
31 alleles at different loci<sup>1,2</sup>. Sex chromosomes harbor the most well-known supergene regions,  
32 but we now know that such genetic architectures are not rare and control variation for many  
33 other complex phenotypes<sup>3,4</sup>. Reduced recombination leads to reduced efficacy of selection,  
34 including reduced ability to remove deleterious mutations, because of interference among  
35 linked loci. This phenomenon<sup>5</sup> is strongest in supergene variants where recombination is fully  
36 suppressed. For example, because the Y (or W) chromosome does not occur in the  
37 homozygous state, genetic hitchhiking and background selection affect the entire length of its  
38 supergene region<sup>2,5-8</sup>. This results in the gradual degeneration of Y (and W) chromosomes,  
39 with two striking long-term effects: the loss of protein-coding genes and the accumulation of  
40 repetitive elements<sup>9,9</sup>, both reducing gene density. This is particularly visible in the human Y  
41 chromosome which has approximately 14 times fewer genes and 5 times lower gene density  
42 than the X chromosome<sup>10,11</sup>.

43 Accumulation of repeats can already happen at early stages of Y chromosome evolution as  
44 shown in *Drosophila miranda* (age 1 million years, i.e. 10 million generations) and *Silene*  
45 *latifolia* (age 6 million years, i.e. 6 million generations)<sup>12</sup>. Intriguingly, the supergene region of  
46 suppressed recombination on the hermaphrodite determining Y<sup>h</sup> chromosome of papaya (7  
47 million years old, i.e. 7 million generations) is approximately two-fold larger than the  
48 homologous region in the X chromosome<sup>13</sup>. Such results suggests that large-scale  
49 accumulation of repetitive elements could precede gene loss. Because repetitive regions are  
50 difficult to study, we know little about how and when such “degenerative expansion”<sup>14</sup> occurs.

51 The young social chromosome supergene system of the red fire ant *Solenopsis invicta*  
52 provides the opportunity to examine the early effects of restricted recombination. Two social  
53 chromosome supergene variants, SB and Sb, control a complex social phenotypic  
54 dimorphism where colonies have either one or up to dozens of reproductive queens<sup>15,16</sup>. The  
55 accumulation of unique SNP alleles indicates that recombination between the two variants  
56 has been suppressed for >350,000 years (i.e., >175,000 generations) over a chromosomal

57 region encompassing >20 Mb and containing >400 protein-coding genes<sup>16</sup>. The suppression  
58 of recombination in *Bb* individuals has led to differentiation between SB and Sb throughout  
59 the entire length of the region<sup>17</sup>. SB can recombine in homozygote diploid *BB* queens.  
60 However, *bb* queens are never observed, either because they fail to reproduce, or because  
61 they die due to other intrinsic reasons<sup>18</sup>. Because Sb has no opportunity to recombine it  
62 should be affected by reduced efficacy of selection in a similar way to a Y or W chromosome.

63 To test whether degenerative expansion is an early effect of suppressed recombination, we  
64 apply a dual approach based on Bionano Genomics Irys optical mapping and short read  
65 Illumina sequence data. In a first step we optically mapped one haploid fire ant male carrying  
66 the SB variant and one carrying the Sb variant. For each individual, we created a *de novo*  
67 assembly of optical contigs (Suppl. File 1).

68 We first performed pairwise alignments between the optical assemblies of the two individuals  
69 to identify large ( $\geq 3$ kb) insertions and deletions (indels). The 187 deletions in the *b* individual  
70 were homogeneously distributed among the 16 chromosomes according to chromosome size  
71 ( $\chi^2_{d.f.=15} = 24.02$ ,  $p = 0.07$ ). However, the social chromosome which carries the supergene  
72 region was significantly enriched in insertions (Fig. 1a and b): this chromosome harbors  
73 33.7% (55) of the 163 mapped insertions despite representing only 8.4% (29.61 Mb) of the  
74 superscaffolded genome (350.94 Mb;  $\chi^2_{d.f.=15} = 152$ ,  $p < 10^{-23}$ ). Similarly, the cumulative  
75 length of insertions on the social chromosome was 58.5% (1.43 Mb) of the cumulative length  
76 of all insertions (2.44 Mb), higher than would be expected if the insertions were  
77 homogeneously distributed across chromosomes. We then identified “overhangs”, unaligned  
78 regions that flank alignments between the optical assemblies of the *B* and the *b* individuals.  
79 Such overhangs either represent indels, highly divergent sequences, or are regions where an  
80 optical assembly is too fragmented. The cumulative amount of overhanging sequence  
81 indicates that the supergene region is 5.27 Mb larger in the *b* individual than in the *B*  
82 individual. This is a significantly greater difference than for chromosomes 1 to 15 (-1.43 to -  
83 0.25 Mb,  $\chi^2_{d.f.=15} = 83.25$ , Bonferroni-corrected  $p < 10^{-14}$ ). Combining the indels detected with  
84 both methods, the *b* variant of the supergene region is 31.27% longer (total length 26.37 Mb)  
85 than the *B* variant (20.9 Mb). This difference in length is likely to be an underestimate  
86 because we cannot detect indels in parts of the genome that are fragmented in both  
87 assemblies.

88 To corroborate our results, we obtained short read Illumina sequence data for one *B* and one  
89 *b* sample from each of five different *S. invicta* populations. We independently estimated  
90 genome size and the proportion of repetitive sequence in the genome of each sample using  
91 the distribution of 21-nucleotide k-mer sequences<sup>19</sup> (Suppl. File 1). Estimated genome sizes  
92 for *b* samples were 3.59% larger (95% confidence interval: 2.02% to 5.16%) than those of *B*  
93 samples (paired one-sided t-test:  $p < 0.002$ ; Fig. 1c). Using a previous estimate that the  
94 supergene region is 4.5% of the genome<sup>17</sup>, and assuming that the difference in genome size  
95 between the *b* and *B* samples is entirely due to the increase in size of Sb in the supergene  
96 region, these data indicate that the Sb variant of the supergene is 79.8% (44.9% to 114.7%)  
97 larger than the SB variant. Furthermore, the genomes of the *b* samples included 4.55 %  
98 more repetitive sequence (0.52% to 8.57%) than the *B* samples (paired one-sided t-test:  
99  $p < 0.018$ , Suppl. File 1).

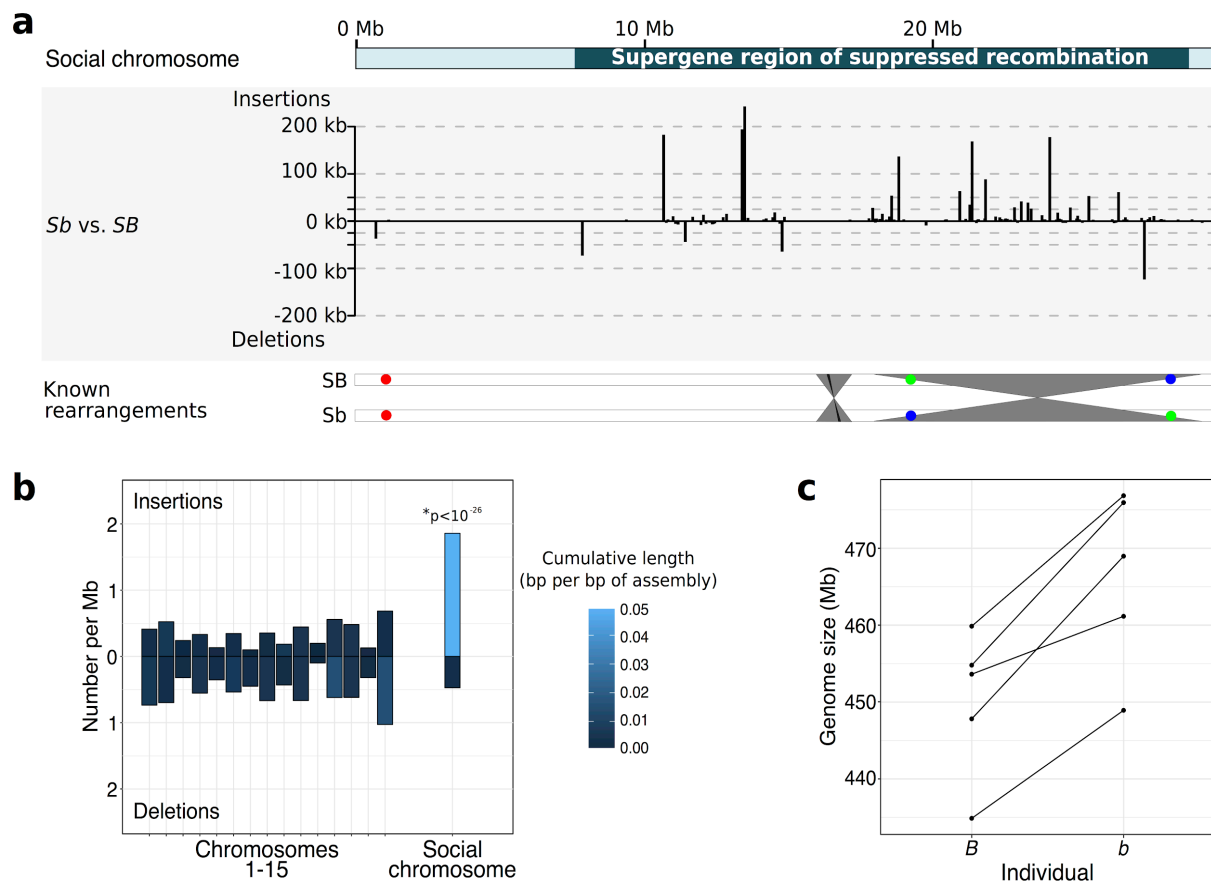

100

101 **Fig. 1 | Accumulation of insertions in *S. invicta* *Sb* supergene variant.** **a**, Graph: Distribution of insertions  
 102 and deletions along the social chromosome are largely within the supergene region (located from position 7.7  
 103 Mb to 28.6 Mb). Bottom: overview of known rearrangements between *SB* and *Sb*. Grey ribbons represent  
 104 inversions detected in this study; black ribbon represents a previously known 48kb inversion; colored circles  
 105 represent BAC-FISH markers A22, E17, E03<sup>16</sup>). **b**, Frequency and cumulative length of insertions and deletions  
 106 in the pairwise comparison of optical contigs between an *S. invicta b* and an *S. invicta B* individual. Insertions  
 107 were not homogeneously distributed among chromosomes ( $\chi^2_{d.f.=15} = 152$ ,  $p < 10^{-23}$ ) with a significant enrichment  
 108 exclusively on “social” chromosome 16, which carries the supergene region (Z-score = 11.1, Bonferroni-  
 109 corrected  $p < 10^{-26}$ ). **c**, Genome sizes estimates using k-mer frequency distributions in raw Illumina sequence are  
 110 higher in five *S. invicta b* individuals than in five paired *B* individuals.

111 Several close relatives of *S. invicta* are also socially polymorphic. Social polymorphism in *S.*  
 112 *quinquecupis* and *S. richteri* (common ancestry with *S. invicta* approximately 788,000 years  
 113 ago; Suppl. File 1) is associated with the *Gp-9* locus which marks the supergene in  
 114 *S. invicta*<sup>20</sup>. We created optical assemblies for one *Gp-9 B* sample and one *Gp-9 b* sample  
 115 from each of the two relatives. To test whether *S. quinquecupis* and *S. richteri* also carry the  
 116 social supergene, we identified indels between the *B* and *b* optical assemblies in each of the  
 117 three *Solenopsis* species. According to neighbor-joining trees based on presence and  
 118 absence of indels for each of chromosomes 1 to 15, individuals cluster by species. In  
 119 contrast, in a tree built using the region of the social chromosome supergene as known from  
 120 *S. invicta*, the *b* individuals cluster separately from the *B* individuals. These data demonstrate  
 121 that the supergene region exists in all three species, and that it likely has a single origin.  
 122 These conclusions are further corroborated by inversions shared across species (Suppl.  
 123 Files). The optical assemblies of the related species had lower contiguity than for *S. invicta*  
 124 but provided the power to compare distributions of insertions and deletions. In both species,

125 the supergene region in the *b* sample had a highly significant enrichment of insertions but not  
126 deletions in comparison to the *B* sample and to the rest of the genome (Suppl. File 1).

127 In sum, *Sb* has accumulated at least 30% more DNA content than *SB*. Despite extensive  
128 efforts<sup>16,21</sup>, we know of almost no differences in content of protein coding genes between *Sb*  
129 and *SB*. Our results thus show that *Sb* is in a stage of degenerative expansion in three  
130 *Solenopsis* species. This expansion is consistent with reduced efficacy of selection against  
131 mildly deleterious mutations such as insertions in non-coding regions<sup>6,14,22</sup>. Our study is the  
132 first to demonstrate degenerative expansion in an animal, but this may be a general feature  
133 of young nonrecombining regions. In stickleback fish, a nascent Y chromosome that is  
134 cytologically indistinguishable from the X includes Y-specific insertions and duplications<sup>23</sup>.  
135 Similarly, the older *Drosophila hydei* Y chromosome is smaller than its X chromosome  
136 counterpart, but carries some of the largest introns of the genome ( $\geq 3.6$  Mb)<sup>24</sup>, perhaps a  
137 remnant of past chromosome-wide expansion. What type of selective pressure could be  
138 responsible for the absence of large deletions in a young supergene region such as the *Sb*  
139 supergene variant? Part of the answer could be that the system is too young, lacking  
140 mechanisms such as dosage compensation<sup>2</sup> or gene relocation that could reduce the fitness  
141 cost of large deletions<sup>8,14</sup>. On the other hand, purifying selection could be much stronger in  
142 ants, where mutations are exposed to strong purifying selection in haploid males, than in  
143 organisms that are always diploid. Such strong purifying selection against loss of genetic  
144 material has indeed been observed in other organisms with haploid life stages<sup>25,26</sup>. Our study  
145 presents a striking example of degenerative expansion, providing evidence for this process  
146 as a hallmark of early supergene evolution and highlighting the important role of  
147 recombination (or the lack thereof) in shaping the genome.

## 148 **Methods**

149 **Optical mapping.** For each of the of species *S. invicta*, *S. quinquecupis* and *S. richteri*, we  
150 extracted high molecular weight (HMW) DNA from one haploid male pupae carrying the *B*  
151 genotype at the *Gp-9* locus and one carrying the *b* genotype, following the Bionano  
152 Genomics (BNG) IrysPrep animal tissue protocol (Suppl. files). Each sample was optically  
153 mapped using BNG nanochannel arrays for 30 cycles. Raw BNG Irys optical molecules  $\geq 100$   
154 kb were processed, analysed and *de novo* assembled in IrysView (BNG, v2.4, scripts v5134,  
155 tools v5122AVX; Suppl. File 1).

156 **Optical assembly comparisons, optical chromosomes.** Comparisons between optical  
157 assemblies were performed by pairwise alignments using BNG IrysView (v2.4;  
158 Supplementary Methods). Large ( $\geq 3$ kb) insertions and deletions (indels) were detected as  
159 previously described<sup>27</sup>. A reciprocal alignment between *S. invicta* optical assemblies (*b* and  
160 *B*) yielded nearly identical results (95% of indel sites were recovered; data not shown),  
161 indicating high consistency of indel detection. We placed and oriented the optical contigs of  
162 the *S. invicta B* optical assembly onto the 16 linkage groups in the *S. invicta* genetic map<sup>17</sup>  
163 using the alignment between the optical contigs and the scaffolds of the *S. invicta B*  
164 reference genome assembly<sup>28</sup> (GCF\_000188075.1; Suppl. File 1). The small portion of  
165 ambiguous placements of the optical contigs from this individual were resolved using  
166 information from optical contigs of the additional males.

167 **K-mer analyses of genome size, repeat content.** We sequenced five *B* and five *b* *S.*  
168 *invicta* haploid male individuals (*i.e.*, 5 pairs) on Illumina HiSeq4000 with 150 bp paired-end  
169 reads. After quality filtering and adapter trimming, we mapped cleaned reads to  
170 mitochondrion, phiX phage and *Wolbachia* reference genomes to enrich for *S. invicta* reads.  
171 From normalized numbers of the putative *S. invicta* reads, we used k-mer distribution  
172 analysis<sup>19</sup> to estimate genome size and repeat content for each sample. Additionally, we  
173 subsampled 0.3x genome coverage of reads from each sample to characterise the types of  
174 repeats present<sup>29</sup> (see Suppl. File 1).

175 **Phylogenetic analysis.** For phylogenetic tree reconstruction and dating we used  
176 mitochondrial sequences generated from Illumina short read data (Suppl. File 1). We  
177 additionally inferred phylogenetic relationships between samples based on presence and  
178 absence of shared indels detected in pairwise comparisons of at least 2 individuals in regions  
179 that had information (coverage) in all 6 individuals.

180 **Data availability.** The data sets generated and analysed during the current study are  
181 available as Suppl. File, NCBI (BioProject PRJNA397545: SUPPF\_0000001241 -  
182 SUPPF\_0000001246) and Genbank (accessions MF592128 - MF592133).

183 **Computer code.** Further details for specific analyses and software input files can be found in  
184 the Suppl. File 1. The source code of used scripts is available from github:  
185 <https://github.com/estolle/BioNano-Irys-tools>.

## 186 References

- 187 1. Rice, W. R. Sex chromosomes and the evolution of sexual dimorphism. *Evolution* **38**,  
188 735 (1984).
- 189 2. Bachtrog, D. *et al.* Are all sex chromosomes created equal? *Trends Genet.* **27**, 350–357  
190 (2011).
- 191 3. Thompson, M. J. & Jiggins, C. D. Supergenes and their role in evolution. *Heredity* **113**,  
192 1–8 (2014).
- 193 4. Schwander, T., Libbrecht, R. & Keller, L. Supergenes and complex phenotypes. *Curr.*  
194 *Biol.* **24**, R288–94 (2014).
- 195 5. Felsenstein, J. The evolutionary advantage of recombination. *Genetics* **78**, 737–756  
196 (1974).
- 197 6. Bachtrog, D. Y-chromosome evolution: emerging insights into processes of Y-  
198 chromosome degeneration. *Nat. Rev. Genet.* **14**, 113–124 (2013).
- 199 7. Bachtrog, D. A dynamic view of sex chromosome evolution. *Curr. Opin. Genet. Dev.* **16**,  
200 578–585 (2006).
- 201 8. Wright, A. E., Dean, R., Zimmer, F. & Mank, J. E. How to make a sex chromosome. *Nat.*  
202 *Commun.* **7**, 12087 (2016).
- 203 9. Charlesworth, B., Sniegowski, P. & Stephan, W. The evolutionary dynamics of repetitive  
204 DNA in eukaryotes. *Nature* **371**, 215–220 (1994).
- 205 10. Ross, M. T. *et al.* The DNA sequence of the human X chromosome. *Nature* **434**, 325–  
206 337 (2005).
- 207 11. Skaletsky, H. *et al.* The male-specific region of the human Y chromosome is a mosaic of  
208 discrete sequence classes. *Nature* **423**, 825–837 (2003).
- 209 12. Hobza, R. *et al.* Impact of Repetitive Elements on the Y Chromosome Formation in  
210 Plants. *Genes* **8**, 302 (2017).
- 211 13. Wang, J. *et al.* Sequencing papaya X and Yh chromosomes reveals molecular basis of  
212 incipient sex chromosome evolution. *Proc. Natl. Acad. Sci. U. S. A.* **109**, 13710–13715  
213 (2012).

- 214 14. Ming, R., Wang, J., Moore, P. H. & Paterson, A. H. Sex chromosomes in flowering  
215 plants. *Am. J. Bot.* **94**, 141–150 (2007).
- 216 15. Keller, L. & Ross, K. G. Selfish genes: a green beard in the red fire ant. *Nature* **394**,  
217 573–575 (1998).
- 218 16. Wang, J. *et al.* A Y-like social chromosome causes alternative colony organization in fire  
219 ants. *Nature* **493**, 664–668 (2013).
- 220 17. Pracana, R., Priyam, A., Levantis, I., Nichols, R. A. & Wurm, Y. The fire ant social  
221 chromosome supergene variant Sb shows low diversity but high divergence from SB.  
222 *Mol. Ecol.* **26**, 2864–2879 (2017).
- 223 18. Gotzek, D. & Ross, K. G. Genetic regulation of colony social organization in fire ants: an  
224 integrative overview. *Q. Rev. Biol.* **82**, 201–226 (2007).
- 225 19. Sun, H., Ding, J., Piednoël, M. & Schneeberger, K. findGSE: estimating genome size  
226 variation within human and *Arabidopsis* using k-mer frequencies. *Bioinformatics* **34**,  
227 550–557 (2018).
- 228 20. Krieger, M. J. B. & Ross, K. G. Molecular evolutionary analyses of the odorant-binding  
229 protein gene *Gp-9* in fire ants and other *Solenopsis* species. *Mol. Biol. Evol.* **22**, 2090–  
230 2103 (2005).
- 231 21. Pracana, R. *et al.* Fire ant social chromosomes: Differences in number, sequence and  
232 expression of odorant binding proteins. *Evolution Letters* **1**, 199–210 (2017).
- 233 22. Na, J.-K., Wang, J. & Ming, R. Accumulation of interspersed and sex-specific repeats in  
234 the non-recombining region of papaya sex chromosomes. *BMC Genomics* **15**, 335  
235 (2014).
- 236 23. Peichel, C. L. *et al.* The master sex-determination locus in threespine sticklebacks is on  
237 a nascent Y chromosome. *Curr. Biol.* **14**, 1416–1424 (2004).
- 238 24. Reugels, A. M., Kurek, R., Lammermann, U. & Bünemann, H. Mega-introns in the  
239 dynein gene *DhDhc7(Y)* on the heterochromatic Y chromosome give rise to the giant  
240 threads loops in primary spermatocytes of *Drosophila hydei*. *Genetics* **154**, 759–769  
241 (2000).
- 242 25. Chibalina, M. V. & Filatov, D. A. Plant Y chromosome degeneration is retarded by  
243 haploid purifying selection. *Curr. Biol.* **21**, 1475–1479 (2011).
- 244 26. Bull, J. J. Sex Chromosomes in Haploid Dioecy: A Unique Contrast to Muller's Theory  
245 for Diploid Dioecy. *Am. Nat.* **112**, 245–250 (1978).
- 246 27. Kawakatsu, T. *et al.* Epigenomic diversity in a global collection of *Arabidopsis thaliana*  
247 accessions. *Cell* **166**, 492–505 (2016).
- 248 28. Wurm, Y. *et al.* The genome of the fire ant *Solenopsis invicta*. *Proc. Natl. Acad. Sci. U.*  
249 *S. A.* **108**, 5679–5684 (2011).
- 250 29. Goubert, C. *et al.* De novo assembly and annotation of the Asian tiger mosquito (*Aedes*  
251 *albopictus*) repeatome with dnaPipeTE from raw genomic reads and comparative  
252 analysis with the yellow fever mosquito (*Aedes aegypti*). *Genome Biol. Evol.* **7**, 1192–  
253 1205 (2015).

## 254 Author contributions

255 E.S. and Y.W. conceived and designed the study. E.S., C.A.C.C. and C.I.P. sampled and  
256 identified and genotyped fire ants. E.S. and R.P. analysed genetic map, assembly  
257 inconsistencies and statistics. R.P. analysed dS ratios. E.S. P.H. and S.B. performed optical  
258 mapping, sample and data processing. E.S. did PCR-product and whole genome library  
259 preparation and sequencing, analysed phylogenies, repeats, sequence and optical mapping  
260 data. Y.W., E.S., R.P. and S.R. wrote the manuscript. All authors gave final approval for the  
261 publication.

## 262 Acknowledgements

263 We thank Maria Cristina Arias, Susy Coelho, Diego Pereira Nogueira Da Silva, Nefertitis Curi,  
264 Natália Souza Araujo (Universidade de São Paulo, Brazil), Rodolfo Jaffé (Instituto Tecnológico  
265 Vale, Belém, Brazil), Emiliano Boné (Universidad de Buenos Aires, Argentina), Yanina Guillij  
266 (Dirección de Gestión de Usos Sustentables de los Recursos Naturales, Área Fauna y Flora  
267 Silvestre, Entre Ríos, Argentina), Dirección de Fauna Silvestre y Dirección de Ordenamiento  
268 Ambiental y Conservación de la Biodiversidad of Secretaria de Medio Ambiente of Argentina,  
269 Nazrath Nawaz, Thomas J. Colgan, Christoph Durrant, Christophe Eizaguirre, Mario dos Reis,  
270 Richard Nichols (Queen Mary University of London, UK), John Wang (Biodiversity Research  
271 Center, Academia Sinica, Taiwan), Michelle Coleman (Kansas State University, USA) and  
272 Bionano Genomics support staff for their help in organising and helping with sampling, permits,  
273 preparation, sequencing or analysis, useful discussions and comments on the manuscript.

274 This project was supported by the Deutscher Akademischer Austauschdienst (DAAD) Postdoc-  
275 Programm (E.S.: 570704 83) and European Commission Marie Curie Actions (E.S.: PIEF-GA-  
276 2013-623713). Additional support came from Biotechnology and Biological Sciences Research  
277 Council (Y.W. BB/K004204/1); the Natural Environment Research Council (grants NE/L00626X/1  
278 (Y.W.), Strategic Capital Investment (S.R.)). Computing was performed at QMUL Research-IT,  
279 using NERC EOS Cloud and MidPlus computational facilities (QMUL VP Research fund and  
280 Engineering and Physical Sciences Research Council grant EP/K000128/1).

## 281 Competing interests

282 The authors declare no competing financial interests.

## 283 Additional information

284 Supplementary Information 1: PDF containing additional figures and data.
